# Supplementary material for: 60S dynamic state of bacterial ribosome is fixed by yeast mitochondrial initiation factor 3
Source: PeerJ. 2018 Sep 17;6:e5620. doi: 10.7717/peerj.5620 (PMC6147165; doi:10.7717/peerj.5620)
Supplement: Supplemental Information 2 — Results of OD measurements. [file peerj-06-5620-s002.xlsx]

## Sheet: All
frac	No proteins	IF3	Aim23	Aim23dNdC
1
2
3
4
5
6
7
8
9
10
11
12	0	0.005	0	0.012
13	0.013	0.007	0.008	0.007
14	0.083	0.13	0.091	0.064
15	0.106	0.373	0.192	0.102
16	0.061	0.363	0.145	0.06
17	0.032	0.242	0.083	0.033
18	0.024	0.116	0.066	0.015
19	0.021	0.059	0.063	0.019
20	0.037	0.054	0.077	0.028
21	0.143	0.236	0.22	0.119
22	0.216	0.615	0.372	0.189
23	0.162	0.616	0.383	0.152
24	0.128	0.52	0.403	0.105
25	0.11	0.369	0.453	0.098
26	0.255	0.268	0.537	0.201
27	0.571	0.204	0.538	0.539
28	0.75	0.206	0.478	0.688
29	0.676	0.201	0.342	0.619
30	0.513	0.15	0.235	0.454
31	0.357	0.092	0.142	0.328
32	0.22	0.045	0.083	0.191
33	0.105	0.019	0.039	0.094
34	0.057	0.012	0.02	0.044
35	0.034	0.009	0.011	0.029
36	0.03	0.009	0.009	0.015
37	0.04
38	0.047
39	0.054
40
